# Supplementary material for: Interplay between base excision repair protein XRCC1 and ALDH2 predicts overall survival in lung and liver cancer patients
Source: Cell Oncol (Dordr). 2018 Aug 7;41(5):527–39. doi: 10.1007/s13402-018-0390-8 (PMC6153960; doi:10.1007/s13402-018-0390-8)
Supplement: Supplementary file 4 — (XLSX 24 kb) [file 13402_2018_390_MOESM4_ESM.xlsx]

## Sheet: TCGA ESOPHAGUS
Patient ID	Cancer Type	OS (IN ANALYSIS CAPPED AT 300 MONTHS)	STATUS (IN ANALYSIS LIVING AFTER 300 MONTHS)	SEX	Site	ALDH2_RNASEQ	XRCC1_RNASEQ	RATIO_XRCC1/ALDH2	ALDH2_MEDIAN_GROUP	XRCC1_MEDIAN_GROUP	RATIO_MEDIAN_GROUP
TCGA-2H-A9GF	Esophageal Adenocarcinoma	#NULL!			Primary Tumor	1097.49	715.683	0.652109	1	2	2
TCGA-LN-A9FO	Esophageal Squamous Cell Carcinoma	0.13	LIVING	MALE	Primary Tumor	5303.2	1179.71	0.222453	2	2	1
TCGA-L5-A43H	Esophageal Squamous Cell Carcinoma	0.3	DECEASED	MALE	Primary Tumor	2286.01	569.367	0.249066	1	1	2
TCGA-L5-A88Y	Esophageal Adenocarcinoma	0.36	LIVING	MALE	Primary Tumor	3010.39	484.074	0.160801	2	1	1
TCGA-IG-A50L	Esophageal Squamous Cell Carcinoma	0.53	LIVING	MALE	Primary Tumor	1153.18	502.341	0.435613	1	1	2
TCGA-IG-A5B8	Esophageal Squamous Cell Carcinoma	0.79	DECEASED	MALE	Primary Tumor	1255.25	742.943	0.591869	1	2	2
TCGA-IG-A3Y9	Esophageal Squamous Cell Carcinoma	0.85	DECEASED	MALE	Primary Tumor	1021.51	746.505	0.730789	1	2	2
TCGA-Z6-A9VB	Esophageal Squamous Cell Carcinoma	1.31	LIVING	MALE	Primary Tumor	2660.87	756.522	0.284314	1	2	2
TCGA-L5-A4OQ	Esophageal Adenocarcinoma	1.38	DECEASED	MALE	Primary Tumor	6522.65	659.112	0.10105	2	2	1
TCGA-VR-A8ET	Esophageal Squamous Cell Carcinoma	1.54	DECEASED	MALE	Primary Tumor	973.151	397.015	0.407968	1	1	2
TCGA-Z6-A8JE	Esophageal Squamous Cell Carcinoma	2.1	LIVING	MALE	Primary Tumor	707.162	1208.15	1.70844	1	2	2
TCGA-R6-A8WC	Esophageal Adenocarcinoma	2.3	LIVING	MALE	Primary Tumor	2337.91	484.946	0.207427	1	1	1
TCGA-L5-A88V	Esophageal Adenocarcinoma	2.6	LIVING	MALE	Primary Tumor	2642.94	1196.74	0.452809	1	2	2
TCGA-IG-A3YB	Esophageal Squamous Cell Carcinoma	2.63	LIVING	MALE	Primary Tumor	4096.06	650.354	0.158776	2	1	1
TCGA-L5-A8NF	Esophageal Adenocarcinoma	2.66	DECEASED	MALE	Primary Tumor	6890.17	454.246	0.0659267	2	1	1
TCGA-Z6-AAPN	Esophageal Squamous Cell Carcinoma	2.66	LIVING	MALE	Primary Tumor	1357.67	747.595	0.550646	1	2	2
TCGA-R6-A8W8	Esophageal Adenocarcinoma	2.89	DECEASED	MALE	Primary Tumor	3525.56	593.713	0.168403	2	1	1
TCGA-L5-A893	Esophageal Adenocarcinoma	3.02	LIVING	FEMALE	Primary Tumor	5394.94	735.062	0.13625	2	2	1
TCGA-L5-A43C	Esophageal Adenocarcinoma	3.15	LIVING	MALE	Primary Tumor	3521.83	709.559	0.201474	2	2	1
TCGA-L5-A4OR	Esophageal Adenocarcinoma	3.15	DECEASED	MALE	Primary Tumor	4115.16	860.262	0.209047	2	2	1
TCGA-L5-A4OO	Esophageal Adenocarcinoma	3.32	LIVING	MALE	Primary Tumor	3508.18	863.522	0.246146	2	2	2
TCGA-V5-A7RC	Esophageal Squamous Cell Carcinoma	3.42	DECEASED	MALE	Primary Tumor	2011.51	769.428	0.382512	1	2	2
TCGA-V5-A7RC	Esophageal Squamous Cell Carcinoma	3.42	DECEASED	MALE	Metastatic	2278.43	924.614	0.405812	1	2	2
TCGA-Z6-A8JD	Esophageal Squamous Cell Carcinoma	3.42	LIVING	MALE	Primary Tumor	841.534	684.864	0.813828	1	2	2
TCGA-JY-A6FE	Esophageal Squamous Cell Carcinoma	3.68	DECEASED	MALE	Primary Tumor	1762.99	1141.26	0.647342	1	2	2
TCGA-L5-A891	Esophageal Adenocarcinoma	3.75	LIVING	MALE	Primary Tumor	7502.94	553.965	0.0738331	2	1	1
TCGA-IG-A4QS	Esophageal Adenocarcinoma	3.88	DECEASED	MALE	Primary Tumor	7340.46	751.99	0.102445	2	2	1
TCGA-2H-A9GQ	Esophageal Adenocarcinoma	4.2	DECEASED	MALE	Primary Tumor	231.991	405.112	1.74624	1	1	2
TCGA-L5-A43J	Esophageal Squamous Cell Carcinoma	4.3	DECEASED	MALE	Primary Tumor	565.538	51.3846	0.0908596	1	1	1
TCGA-LN-A5U5	Esophageal Squamous Cell Carcinoma	4.47	DECEASED	MALE	Primary Tumor	6573.27	775.76	0.118017	2	2	1
TCGA-IG-A8O2	Esophageal Squamous Cell Carcinoma	4.66	DECEASED	MALE	Primary Tumor	5151.74	1166.02	0.226336	2	2	2
TCGA-L5-A4OG	Esophageal Adenocarcinoma	4.7	LIVING	FEMALE	Primary Tumor	2574.02	448.416	0.174209	1	1	1
TCGA-L5-A4OT	Esophageal Adenocarcinoma	4.89	DECEASED	MALE	Primary Tumor	4132.36	379.8	0.0919087	2	1	1
TCGA-R6-A6KZ	Esophageal Adenocarcinoma	5.06	DECEASED	MALE	Primary Tumor	1884.86	1131.93	0.600536	1	2	2
TCGA-Q9-A6FU	Esophageal Squamous Cell Carcinoma	5.16	DECEASED	FEMALE	Primary Tumor	2347.46	574.824	0.244871	1	1	2
TCGA-V5-A7RB	Esophageal Adenocarcinoma	5.29	DECEASED	MALE	Primary Tumor	4852.3	1046.66	0.215703	2	2	1
TCGA-L5-A8NN	Esophageal Adenocarcinoma	5.49	LIVING	MALE	Primary Tumor	3334.07	839.291	0.251732	2	2	2
TCGA-2H-A9GL	Esophageal Adenocarcinoma	5.91	DECEASED	MALE	Primary Tumor	4815.87	787.654	0.163554	2	2	1
TCGA-LN-A49K	Esophageal Squamous Cell Carcinoma	5.91	DECEASED	MALE	Primary Tumor	1655.73	700.02	0.422786	1	2	2
TCGA-KH-A6WC	Esophageal Squamous Cell Carcinoma	6.27	LIVING	MALE	Primary Tumor	3689.8	508.159	0.13772	2	1	1
TCGA-R6-A6XQ	Esophageal Adenocarcinoma	6.34	DECEASED	MALE	Primary Tumor	8900.51	799.631	0.0898411	2	2	1
TCGA-RE-A7BO	Esophageal Adenocarcinoma	7	DECEASED	FEMALE	Primary Tumor	4193.68	645.899	0.154017	2	1	1
TCGA-R6-A6L6	Esophageal Adenocarcinoma	7.03	DECEASED	MALE	Primary Tumor	1980.16	692.516	0.349727	1	2	2
TCGA-L5-A4OW	Esophageal Adenocarcinoma	7.13	DECEASED	FEMALE	Primary Tumor	3357.37	675.206	0.201112	2	2	1
TCGA-L5-A4OP	Esophageal Adenocarcinoma	7.16	LIVING	FEMALE	Primary Tumor	2333.71	306.209	0.131211	1	1	1
TCGA-L5-A88Z	Esophageal Squamous Cell Carcinoma	7.39	LIVING	FEMALE	Primary Tumor	1847	616.086	0.33356	1	1	2
TCGA-L5-A4OX	Esophageal Adenocarcinoma	7.42	DECEASED	MALE	Primary Tumor	4903.31	626.603	0.127792	2	1	1
TCGA-R6-A6DQ	Esophageal Adenocarcinoma	7.59	DECEASED	FEMALE	Primary Tumor	2517.68	507.706	0.201656	1	1	1
TCGA-2H-A9GK	Esophageal Adenocarcinoma	7.62	DECEASED	MALE	Primary Tumor	6663.05	645.035	0.0968078	2	1	1
TCGA-IC-A6RE	Esophageal Adenocarcinoma	7.69	LIVING	MALE	Primary Tumor	3588.82	691.926	0.1928	2	2	1
TCGA-L5-A8NM	Esophageal Adenocarcinoma	7.75	DECEASED	FEMALE	Primary Tumor	3315.2	512.618	0.154627	2	1	1
TCGA-Q9-A6FW	Esophageal Adenocarcinoma	7.82	LIVING	MALE	Primary Tumor	3114.85	495.241	0.158994	2	1	1
TCGA-R6-A6DN	Esophageal Adenocarcinoma	7.98	DECEASED	MALE	Primary Tumor	1127.08	672.31	0.596506	1	2	2
TCGA-VR-A8EW	Esophageal Squamous Cell Carcinoma	8.11	DECEASED	MALE	Primary Tumor	2399.42	790.75	0.329559	1	2	2
TCGA-L5-A8NR	Esophageal Adenocarcinoma	8.71	LIVING	FEMALE	Primary Tumor	2082.57	657.23	0.315585	1	1	2
TCGA-2H-A9GN	Esophageal Adenocarcinoma	8.94	DECEASED	MALE	Primary Tumor	2579.76	524.748	0.20341	1	1	1
TCGA-L5-A43M	Esophageal Adenocarcinoma	8.94	LIVING	FEMALE	Primary Tumor	5365.55	431.926	0.0804999	2	1	1
TCGA-V5-AASX	Esophageal Adenocarcinoma	8.97	LIVING	MALE	Primary Tumor	4430.06	465.061	0.104979	2	1	1
TCGA-VR-AA7D	Esophageal Squamous Cell Carcinoma	9.17	DECEASED	MALE	Primary Tumor	1448.2	701.692	0.484528	1	2	2
TCGA-V5-AASW	Esophageal Adenocarcinoma	9.26	LIVING	MALE	Primary Tumor	4080.82	658.881	0.161458	2	2	1
TCGA-IG-A4QT	Esophageal Squamous Cell Carcinoma	9.3	DECEASED	MALE	Primary Tumor	2808.26	928.243	0.330541	1	2	2
TCGA-R6-A6Y2	Esophageal Adenocarcinoma	9.3	DECEASED	MALE	Primary Tumor	3989.72	679.318	0.170267	2	2	1
TCGA-IG-A6QS	Esophageal Squamous Cell Carcinoma	9.95	DECEASED	MALE	Primary Tumor	1467.93	3073	2.09342	1	2	2
TCGA-L7-A6VZ	Esophageal Adenocarcinoma	10.35	LIVING	MALE	Primary Tumor	4435.34	762.236	0.171855	2	2	1
TCGA-LN-A49L	Esophageal Squamous Cell Carcinoma	10.45	DECEASED	MALE	Primary Tumor	10590.2	546.677	0.0516212	2	1	1
TCGA-LN-A7HV	Esophageal Squamous Cell Carcinoma	10.51	LIVING	MALE	Primary Tumor	10238.5	674.342	0.0658635	2	2	1
TCGA-L7-A56G	Esophageal Squamous Cell Carcinoma	10.84	DECEASED	MALE	Primary Tumor	4321.88	593.269	0.137271	2	1	1
TCGA-VR-AA7B	Esophageal Squamous Cell Carcinoma	11.24	LIVING	FEMALE	Primary Tumor	254.629	905.115	3.55465	1	2	2
TCGA-LN-A4A9	Esophageal Squamous Cell Carcinoma	11.53	DECEASED	MALE	Primary Tumor	739.496	403.361	0.545454	1	1	2
TCGA-LN-A7HW	Esophageal Squamous Cell Carcinoma	11.99	LIVING	MALE	Primary Tumor	1883.24	706.258	0.375022	1	2	2
TCGA-LN-A7HY	Esophageal Squamous Cell Carcinoma	12.02	LIVING	MALE	Primary Tumor	1019.43	774.834	0.760069	1	2	2
TCGA-LN-A9FP	Esophageal Squamous Cell Carcinoma	12.02	LIVING	FEMALE	Primary Tumor	3566.65	398.214	0.111649	2	1	1
TCGA-IG-A97I	Esophageal Squamous Cell Carcinoma	12.16	LIVING	MALE	Primary Tumor	927.337	670.194	0.722708	1	2	2
TCGA-LN-A7HX	Esophageal Squamous Cell Carcinoma	12.22	LIVING	MALE	Primary Tumor	1051.49	436.314	0.414948	1	1	2
TCGA-LN-A9FR	Esophageal Squamous Cell Carcinoma	12.25	LIVING	MALE	Primary Tumor	1469.87	473.376	0.322054	1	1	2
TCGA-LN-A49P	Esophageal Squamous Cell Carcinoma	12.32	LIVING	MALE	Primary Tumor	2330.68	435.181	0.186718	1	1	1
TCGA-LN-A4MQ	Esophageal Squamous Cell Carcinoma	12.32	LIVING	MALE	Primary Tumor	2543.74	677.003	0.266144	1	2	2
TCGA-LN-A5U6	Esophageal Squamous Cell Carcinoma	12.32	LIVING	MALE	Primary Tumor	2177.53	697.969	0.320533	1	2	2
TCGA-LN-A8HZ	Esophageal Squamous Cell Carcinoma	12.32	LIVING	MALE	Primary Tumor	1120.75	729.968	0.651323	1	2	2
TCGA-LN-A49N	Esophageal Squamous Cell Carcinoma	12.42	LIVING	MALE	Primary Tumor	2161.47	597.575	0.276467	1	1	2
TCGA-VR-A8ER	Esophageal Squamous Cell Carcinoma	12.42	DECEASED	MALE	Primary Tumor	496.557	958.684	1.93066	1	2	2
TCGA-LN-A49Y	Esophageal Squamous Cell Carcinoma	12.45	LIVING	MALE	Primary Tumor	1141.43	419.301	0.367347	1	1	2
TCGA-LN-A4A2	Esophageal Squamous Cell Carcinoma	12.48	LIVING	MALE	Primary Tumor	828.629	617.106	0.744731	1	1	2
TCGA-LN-A49V	Esophageal Squamous Cell Carcinoma	12.58	LIVING	MALE	Primary Tumor	3843.4	580.742	0.151101	2	1	1
TCGA-LN-A4A1	Esophageal Squamous Cell Carcinoma	12.58	LIVING	MALE	Primary Tumor	871.842	507.429	0.58202	1	1	2
TCGA-LN-A4A4	Esophageal Squamous Cell Carcinoma	12.58	LIVING	MALE	Primary Tumor	870.449	494.188	0.56774	1	1	2
TCGA-LN-A49X	Esophageal Squamous Cell Carcinoma	12.61	LIVING	MALE	Primary Tumor	634.461	761.236	1.19982	1	2	2
TCGA-LN-A49M	Esophageal Squamous Cell Carcinoma	12.65	LIVING	MALE	Primary Tumor	3353.53	604.05	0.180124	2	1	1
TCGA-R6-A8WG	Esophageal Adenocarcinoma	12.68	DECEASED	MALE	Primary Tumor	3017.51	1028.46	0.340829	2	2	2
TCGA-LN-A4A3	Esophageal Squamous Cell Carcinoma	12.75	LIVING	MALE	Primary Tumor	2129.09	731.576	0.34361	1	2	2
TCGA-IG-A625	Esophageal Squamous Cell Carcinoma	12.81	DECEASED	MALE	Primary Tumor	4156.16	519.236	0.124932	2	1	1
TCGA-LN-A4A6	Esophageal Squamous Cell Carcinoma	12.84	LIVING	MALE	Primary Tumor	955.198	625.306	0.654635	1	1	2
TCGA-LN-A9FQ	Esophageal Squamous Cell Carcinoma	12.84	LIVING	MALE	Primary Tumor	1343.47	577.708	0.430012	1	1	2
TCGA-L5-A8NH	Esophageal Adenocarcinoma	12.91	DECEASED	MALE	Primary Tumor	4148.15	524.059	0.126336	2	1	1
TCGA-LN-A49S	Esophageal Squamous Cell Carcinoma	13.14	LIVING	MALE	Primary Tumor	2885.03	417.505	0.144715	1	1	1
TCGA-LN-A7HZ	Esophageal Squamous Cell Carcinoma	13.17	LIVING	MALE	Primary Tumor	3141.54	1092.55	0.347774	2	2	2
TCGA-LN-A8I1	Esophageal Squamous Cell Carcinoma	13.17	LIVING	FEMALE	Primary Tumor	9120.7	1094.13	0.119962	2	2	1
TCGA-L5-A8NL	Esophageal Adenocarcinoma	13.21	LIVING	MALE	Primary Tumor	4505.19	488.756	0.108487	2	1	1
TCGA-LN-A4MR	Esophageal Squamous Cell Carcinoma	13.21	LIVING	MALE	Primary Tumor	399.719	595.184	1.48901	1	1	2
TCGA-LN-A49W	Esophageal Squamous Cell Carcinoma	13.24	LIVING	MALE	Primary Tumor	3275.78	611.031	0.18653	2	1	1
TCGA-LN-A49R	Esophageal Squamous Cell Carcinoma	13.37	LIVING	MALE	Primary Tumor	3309.65	608.338	0.183807	2	1	1
TCGA-LN-A8I0	Esophageal Squamous Cell Carcinoma	13.37	LIVING	MALE	Primary Tumor	2416.16	716.442	0.296521	1	2	2
TCGA-L5-A8NS	Esophageal Adenocarcinoma	13.4	LIVING	MALE	Primary Tumor	3579.18	574.83	0.160604	2	1	1
TCGA-LN-A49O	Esophageal Squamous Cell Carcinoma	13.4	LIVING	MALE	Primary Tumor	139.667	581.71	4.16497	1	1	2
TCGA-L5-A8NI	Esophageal Adenocarcinoma	13.47	DECEASED	MALE	Primary Tumor	1755.63	1002.9	0.57125	1	2	2
TCGA-L5-A8NK	Esophageal Squamous Cell Carcinoma	13.53	LIVING	FEMALE	Primary Tumor	2650.3	729.267	0.275164	1	2	2
TCGA-2H-A9GM	Esophageal Adenocarcinoma	13.93	DECEASED	MALE	Primary Tumor	4567.4	487.716	0.106782	2	1	1
TCGA-2H-A9GI	Esophageal Adenocarcinoma	14.29	DECEASED	MALE	Primary Tumor	3662.33	422.53	0.115372	2	1	1
TCGA-XP-A8T8	Esophageal Squamous Cell Carcinoma	14.36	LIVING	MALE	Primary Tumor	345.04	608.255	1.76285	1	1	2
TCGA-IG-A97H	Esophageal Squamous Cell Carcinoma	14.49	LIVING	MALE	Primary Tumor	2270.77	1090.26	0.480127	1	2	2
TCGA-IG-A7DP	Esophageal Adenocarcinoma	14.85	LIVING	FEMALE	Primary Tumor	4329.39	734.449	0.169643	2	2	1
TCGA-LN-A49U	Esophageal Squamous Cell Carcinoma	15.34	LIVING	MALE	Primary Tumor	1299.97	936.002	0.720019	1	2	2
TCGA-V5-AASV	Esophageal Squamous Cell Carcinoma	15.34	LIVING	MALE	Primary Tumor	1734.4	1519.6	0.876153	1	2	2
TCGA-L5-A88S	Esophageal Squamous Cell Carcinoma	15.47	LIVING	MALE	Primary Tumor	2012.1	601.24	0.298812	1	1	2
TCGA-LN-A4A8	Esophageal Squamous Cell Carcinoma	15.51	LIVING	MALE	Primary Tumor	7779.34	1035.12	0.13306	2	2	1
TCGA-IC-A6RF	Esophageal Squamous Cell Carcinoma	15.67	LIVING	FEMALE	Primary Tumor	970.368	960	0.989316	1	2	2
TCGA-R6-A8W5	Esophageal Adenocarcinoma	15.77	DECEASED	MALE	Primary Tumor	5128.27	488.511	0.0952584	2	1	1
TCGA-VR-AA7I	Esophageal Squamous Cell Carcinoma	15.9	DECEASED	MALE	Primary Tumor	3616.08	924.773	0.255739	2	2	2
TCGA-2H-A9GO	Esophageal Adenocarcinoma	16.23	DECEASED	MALE	Primary Tumor	4393.01	608.732	0.138568	2	1	1
TCGA-R6-A6L4	Esophageal Adenocarcinoma	16.29	DECEASED	MALE	Primary Tumor	2785.71	734.834	0.263786	1	2	2
TCGA-V5-A7RE	Esophageal Adenocarcinoma	16.43	LIVING	MALE	Primary Tumor	2953.12	897.869	0.304041	1	2	2
TCGA-L5-A8NJ	Esophageal Adenocarcinoma	16.46	LIVING	MALE	Primary Tumor	7659.94	1147.35	0.149786	2	2	1
TCGA-IG-A51D	Esophageal Squamous Cell Carcinoma	17.02	LIVING	MALE	Primary Tumor	2426.9	1170.16	0.482163	1	2	2
TCGA-VR-AA4G	Esophageal Squamous Cell Carcinoma	18.04	LIVING	FEMALE	Primary Tumor	2521.26	706.017	0.280026	1	2	2
TCGA-VR-A8EZ	Esophageal Squamous Cell Carcinoma	18.17	DECEASED	MALE	Primary Tumor	650.275	939.817	1.44526	1	2	2
TCGA-X8-AAAR	Esophageal Adenocarcinoma	18.2	LIVING	MALE	Primary Tumor	3411.83	799.244	0.234257	2	2	2
TCGA-L5-A43I	Esophageal Adenocarcinoma	18.27	DECEASED	MALE	Primary Tumor	6891.61	410.652	0.0595873	2	1	1
TCGA-VR-A8EU	Esophageal Squamous Cell Carcinoma	18.3	DECEASED	MALE	Primary Tumor	2086	592.062	0.283827	1	1	2
TCGA-L5-A4ON	Esophageal Adenocarcinoma	18.33	DECEASED	MALE	Primary Tumor	6260.03	300.401	0.0479872	2	1	1
TCGA-IG-A4P3	Esophageal Squamous Cell Carcinoma	18.63	DECEASED	MALE	Primary Tumor	3914.73	951.669	0.243099	2	2	2
TCGA-ZR-A9CJ	Esophageal Adenocarcinoma	19.71	DECEASED	MALE	Primary Tumor	2974.71	427.059	0.143563	2	1	1
TCGA-L5-A4OI	Esophageal Adenocarcinoma	19.97	LIVING	MALE	Primary Tumor	3650.8	422.161	0.115635	2	1	1
TCGA-S8-A6BV	Esophageal Adenocarcinoma	20.01	LIVING	MALE	Primary Tumor	3506.31	489.491	0.139603	2	1	1
TCGA-2H-A9GG	Esophageal Adenocarcinoma	20.04	DECEASED	MALE	Primary Tumor	4695.6	544.235	0.115903	2	1	1
TCGA-IG-A3YC	Esophageal Squamous Cell Carcinoma	20.11	LIVING	MALE	Primary Tumor	3380.42	734.565	0.2173	2	2	1
TCGA-S8-A6BW	Esophageal Squamous Cell Carcinoma	20.37	LIVING	MALE	Primary Tumor	533.117	720.12	1.35077	1	2	2
TCGA-IG-A3YA	Esophageal Squamous Cell Carcinoma	20.76	LIVING	MALE	Primary Tumor	2563.87	512.674	0.199961	1	1	1
TCGA-L5-A4OJ	Esophageal Adenocarcinoma	20.99	LIVING	FEMALE	Primary Tumor	10959.3	736.504	0.0672034	2	2	1
TCGA-L5-A8NQ	Esophageal Squamous Cell Carcinoma	21.35	DECEASED	MALE	Primary Tumor	3397.69	676.301	0.199047	2	2	1
TCGA-JY-A939	Esophageal Adenocarcinoma	21.68	LIVING	MALE	Primary Tumor	6028.46	567.223	0.0940908	2	1	1
TCGA-LN-A4A5	Esophageal Squamous Cell Carcinoma	22.37	DECEASED	MALE	Primary Tumor	2550.88	693.727	0.271956	1	2	2
TCGA-L5-A88T	Esophageal Adenocarcinoma	22.8	LIVING	MALE	Primary Tumor	4169.71	539.621	0.129415	2	1	1
TCGA-VR-A8EQ	Esophageal Adenocarcinoma	22.8	DECEASED	MALE	Primary Tumor	12063.3	629.896	0.0522159	2	1	1
TCGA-JY-A93C	Esophageal Adenocarcinoma	23.16	LIVING	MALE	Primary Tumor	2915.99	626.317	0.214787	1	1	1
TCGA-IG-A5S3	Esophageal Squamous Cell Carcinoma	23.39	LIVING	FEMALE	Primary Tumor	4442.65	1106.63	0.249093	2	2	2
TCGA-L5-A4OE	Esophageal Adenocarcinoma	23.98	DECEASED	MALE	Primary Tumor	3612.82	486.539	0.13467	2	1	1
TCGA-JY-A93F	Esophageal Squamous Cell Carcinoma	24.01	LIVING	FEMALE	Primary Tumor	350.7	507.508	1.44713	1	1	2
TCGA-XP-A8T6	Esophageal Squamous Cell Carcinoma	25.07	DECEASED	MALE	Primary Tumor	3268.5	800.659	0.244962	2	2	2
TCGA-L5-A88W	Esophageal Squamous Cell Carcinoma	25.1	DECEASED	MALE	Primary Tumor	2175.47	664.845	0.30561	1	2	2
TCGA-JY-A93E	Esophageal Adenocarcinoma	25.2	LIVING	MALE	Primary Tumor	3317.82	520.667	0.15693	2	1	1
TCGA-LN-A5U7	Esophageal Squamous Cell Carcinoma	25.23	LIVING	MALE	Primary Tumor	1643.49	692.79	0.421536	1	2	2
TCGA-VR-A8EO	Esophageal Squamous Cell Carcinoma	25.79	LIVING	MALE	Primary Tumor	3171.66	1158.7	0.365331	2	2	2
TCGA-L5-A4OF	Esophageal Adenocarcinoma	26.31	DECEASED	MALE	Primary Tumor	3102.85	658.042	0.212077	2	1	1
TCGA-VR-A8EP	Esophageal Squamous Cell Carcinoma	27.07	LIVING	MALE	Primary Tumor	1098.79	577.092	0.525207	1	1	2
TCGA-L5-A8NT	Esophageal Adenocarcinoma	27.1	LIVING	MALE	Primary Tumor	2149.4	480.539	0.223569	1	1	1
TCGA-VR-A8EX	Esophageal Squamous Cell Carcinoma	28.09	DECEASED	MALE	Primary Tumor	1695.08	859.882	0.507282	1	2	2
TCGA-L5-A4OU	Esophageal Adenocarcinoma	28.98	LIVING	MALE	Primary Tumor	3882.16	586.342	0.151035	2	1	1
TCGA-L5-A43E	Esophageal Adenocarcinoma	30.22	LIVING	MALE	Primary Tumor	4238.1	289.916	0.0684071	2	1	1
TCGA-2H-A9GH	Esophageal Adenocarcinoma	31.24	DECEASED	MALE	Primary Tumor	3703.78	539.301	0.145608	2	1	1
TCGA-JY-A93D	Esophageal Adenocarcinoma	31.54	DECEASED	MALE	Primary Tumor	3328.75	505.959	0.151997	2	1	1
TCGA-2H-A9GR	Esophageal Adenocarcinoma	32.42	DECEASED	MALE	Primary Tumor	4409.29	532.855	0.120848	2	1	1
TCGA-L5-A4OH	Esophageal Adenocarcinoma	32.59	LIVING	MALE	Primary Tumor	2186.3	589.021	0.269414	1	1	2
TCGA-M9-A5M8	Esophageal Adenocarcinoma	33.08	LIVING	MALE	Primary Tumor	6949.41	665.525	0.095767	2	2	1
TCGA-IG-A3I8	Esophageal Squamous Cell Carcinoma	33.25	LIVING	FEMALE	Primary Tumor	2572.2	919.239	0.357374	1	2	2
TCGA-VR-A8EY	Esophageal Squamous Cell Carcinoma	33.67	LIVING	FEMALE	Primary Tumor	2639.3	789.7	0.299208	1	2	2
TCGA-JY-A938	Esophageal Adenocarcinoma	34.82	LIVING	MALE	Primary Tumor	4052	814.794	0.201085	2	2	1
TCGA-IG-A3QL	Esophageal Squamous Cell Carcinoma	35.18	LIVING	MALE	Primary Tumor	1248.2	1045.27	0.837423	1	2	2
TCGA-L5-A8NG	Esophageal Adenocarcinoma	35.94	LIVING	MALE	Primary Tumor	2396.63	501.436	0.209226	1	1	1
TCGA-R6-A6XG	Esophageal Adenocarcinoma	38.37	LIVING	MALE	Primary Tumor	7107.09	1215.74	0.17106	2	2	1
TCGA-XP-A8T7	Esophageal Squamous Cell Carcinoma	41.2	LIVING	FEMALE	Primary Tumor	0	0	0	1	1	1
TCGA-JY-A6FG	Esophageal Squamous Cell Carcinoma	41.49	DECEASED	MALE	Primary Tumor	12088.5	629.954	0.0521117	2	1	1
TCGA-JY-A6FA	Esophageal Squamous Cell Carcinoma	44.71	DECEASED	MALE	Primary Tumor	953.532	630.662	0.661396	1	1	2
TCGA-L5-A8NW	Esophageal Adenocarcinoma	46.06	DECEASED	MALE	Primary Tumor	2105.28	569.785	0.270646	1	1	2
TCGA-VR-AA4D	Esophageal Adenocarcinoma	46.16	DECEASED	MALE	Primary Tumor	3079.22	800.83	0.260076	2	2	2
TCGA-JY-A6FH	Esophageal Adenocarcinoma	47.34	LIVING	MALE	Primary Tumor	6115.12	687.797	0.112475	2	2	1
TCGA-L5-A4OM	Esophageal Squamous Cell Carcinoma	47.9	DECEASED	FEMALE	Primary Tumor	2536.67	616.667	0.243101	1	1	2
TCGA-VR-A8Q7	Esophageal Squamous Cell Carcinoma	52.23	LIVING	MALE	Primary Tumor	860.031	568.453	0.660969	1	1	2
TCGA-L5-A8NV	Esophageal Adenocarcinoma	52.53	DECEASED	MALE	Primary Tumor	4591.99	623.862	0.135859	2	1	1
TCGA-R6-A6Y0	Esophageal Adenocarcinoma	53.91	LIVING	MALE	Primary Tumor	2803.91	545.79	0.194653	1	1	1
TCGA-L5-A8NE	Esophageal Adenocarcinoma	55.45	LIVING	MALE	Primary Tumor	3291.16	720.606	0.218952	2	2	1
TCGA-2H-A9GJ	Esophageal Adenocarcinoma	58.51	DECEASED	MALE	Primary Tumor	5347.87	725.61	0.135682	2	2	1
TCGA-L5-A4OS	Esophageal Adenocarcinoma	58.54	LIVING	FEMALE	Primary Tumor	1611.02	456.761	0.283523	1	1	2
TCGA-JY-A6FB	Esophageal Adenocarcinoma	60.35	LIVING	MALE	Primary Tumor	6284.97	634.043	0.100882	2	1	1
TCGA-JY-A6FD	Esophageal Squamous Cell Carcinoma	67.97	LIVING	FEMALE	Primary Tumor	970.97	529.319	0.545145	1	1	2
TCGA-L5-A8NU	Esophageal Adenocarcinoma	83.18	DECEASED	MALE	Primary Tumor	5074.44	731.519	0.144158	2	2	1
TCGA-JY-A6F8	Esophageal Adenocarcinoma	122.01	LIVING	MALE	Primary Tumor	7921.91	1271.32	0.160481	2	2	1
